# Supplementary material for: Green light-emitting LaPO4 : Ce3+:Tb3+ koosh nanoballs assembled by p-sulfonato-calix[6]arene coated superparamagnetic Fe3O4
Source: Royal Society of Chemistry journal article supplement (doi:10.1039/c001098g), 2010-01-01
Supplement: c001098g.pdf [file c001098g.pdf]

## Supporting Information

# Green Light-Emitting LaPO<sub>4</sub>:Ce<sup>3+</sup>:Tb<sup>3+</sup> Koosh Nanoballs Assembled by *p*-sulfonato-Calix[6]arene Coated Superparamagnetic Fe<sub>3</sub>O<sub>4</sub>

Jie Fang,<sup>a,b</sup> Martin Saunders,<sup>c</sup> Yanglong Guo,<sup>a</sup> Guanzhong Lu,<sup>a</sup> Colin L. Raston<sup>\*b</sup> and K. Swaminathan Iyer<sup>\*b</sup>

<sup>a</sup> Key Laboratory for Advanced Materials and Research Institute of Industrial Catalysis, East China University of Science and Technology, Shanghai 200237, P. R. China.

<sup>b</sup> Centre for Strategic Nano-Fabrication, School of Biomedical, Biomolecular and Chemical Sciences The University of Western Australia, Crawley, WA 6009, Australia. Fax: +61 8 6488 8683; Tel: +61 8 6488 3045; E-mail: CLR: colin.raston@uwa.edu.au and KSI: swaminatha.iyer@uwa.edu.au

<sup>c</sup> Centre for Microscopy, Characterisation and Analysis, The University of Western Australia, Crawley, WA 6009, Australia

## Experimental

*Materials and Methods:* All chemicals utilized in the synthesis were purchased from Sigma-Aldrich without further purification. SC[6] was synthesized according to the literature.<sup>1</sup>

In a typical synthesis, 0.25 mmol FeCl<sub>3</sub>·6H<sub>2</sub>O and 0.125 mmol FeCl<sub>2</sub>·4H<sub>2</sub>O was added to 10 mL degassed MilliQ water under a N<sub>2</sub> atmosphere and constant stirring. Following which 9 mg SC[6] was added to the mixture. 1.1 mL 1M NaOH was added dropwise through a funnel. After constant stirring for about 2 hours, the pH of the solution was adjusted to about neutral. 1.125 mmol LaCl<sub>3</sub>·7H<sub>2</sub>O and 0.125 mmol EuCl<sub>3</sub>·6H<sub>2</sub>O was added, and the solution was allowed to stir for another 2 hours. Finally, 1.4 mL 1M NaH<sub>2</sub>PO<sub>4</sub> was added dropwise. And the mixture was allowed to age for 2 hours.

Fe<sub>3</sub>O<sub>4</sub>@SC[6]-LaPO<sub>4</sub>:Ce<sup>3+</sup>:Tb<sup>3+</sup> was prepared in a similar way except 0.5 mmol LaCl<sub>3</sub>·7H<sub>2</sub>O, 0.56 mmol CeCl<sub>3</sub>·7H<sub>2</sub>O and 0.19 mmol TbCl<sub>3</sub>·6H<sub>2</sub>O was added.

Products was separated with a magnet and purified by several washes using deionised water and re-dispersed in degassed water.

*Characterisation:* Transmission electron microscopy images were obtained using TEM Jeol 3000F operated at 300 kV. So were high-resolution transmission electron microscopy (HRTEM) images, energy filtered transmission electron microscopy (EFTEM) images and electron energy loss spectrum (EELS). Selected area electron diffraction patterns (SAED) were obtained using TEM Jeol 2100 operated at 200 kV.

The FTIR and fluorescence spectra were measured on FTIR-Perkin Elmer and Varian Spectrofluorometer respectively.

Magnetic susceptibility measurements were performed on lyophilized samples using a magnetometer (Quantum Design MPMS-XL-5) equipped with a SQUID sensor.

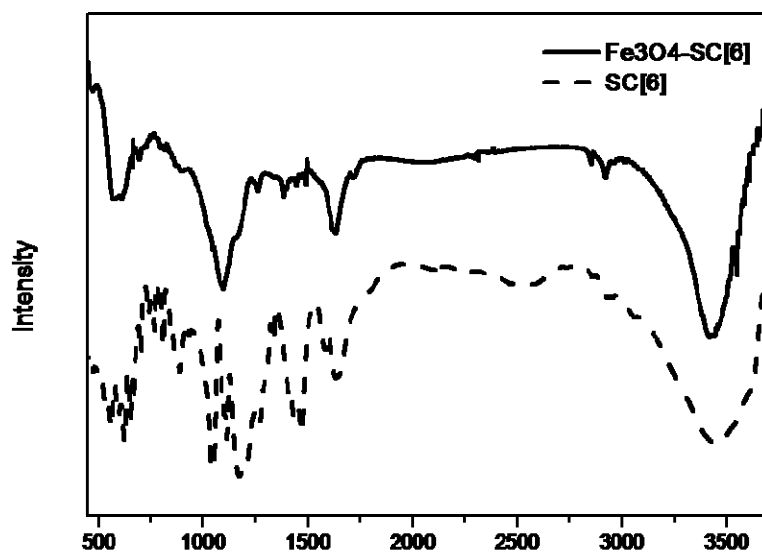

Fig. SI1 FTIR spectra of SC[6] and Fe<sub>3</sub>O<sub>4</sub>@SC[6]-LaPO<sub>4</sub>:Ce<sup>3+</sup>:Tb<sup>3+</sup>

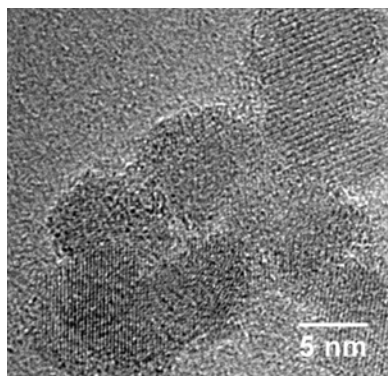

**Fig. SI2** High resolution TEM image of Fe<sub>3</sub>O<sub>4</sub>@SC[6]

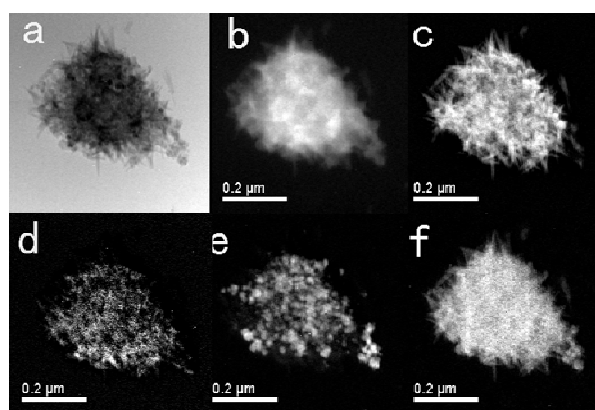

**Fig. SI3** EFTEM images of a Fe<sub>3</sub>O<sub>4</sub>@SC[6]-LaPO<sub>4</sub>:Eu<sup>3+</sup> nanocomposite, (a): unfiltered image, (b): thickness map, (c): lanthanum map, (d): europium map (e): oxygen map and (f): iron map.

S. Shinkai, S. Mori, H. Koreishi, T. Tsubaki, O. Manabe, *J. Am. Chem. Soc.* 1986, **108**, 2409-2416.
